# Supplementary material for: Near infrared imaging of intracellular GSH by AuNCs@MnO2 core–shell nanoparticles based on the absorption competition mechanism
Source: Royal Society of Chemistry journal article supplement (doi:10.1039/d1an00839k), 2021-01-01
Supplement: d1an00839k1.pdf [file d1an00839k1.pdf]

## Supplementary Information

### **Near infrared imaging of intracellular GSH by AuNCs@MnO<sub>2</sub> core-shell nanoparticles based on absorption competition mechanism**

Haiyang Yao,<sup>a</sup> Difei Jiang,<sup>a</sup> Gaoqiu Dong,<sup>b</sup> Jiamin Sun,<sup>a</sup> Shasha Sun,<sup>a</sup>

Lingling Li,<sup>b</sup> Fenfen Zheng,<sup>\*,a</sup> and Weiwei Xiong<sup>\*,a,c</sup>

<sup>a</sup>School of Environmental & Chemical Engineering, Jiangsu University of Science and Technology, Zhenjiang, Jiangsu 212003, China.

<sup>b</sup>School of Pharmacy, Nanjing Medical University, Nanjing 211166, China.

<sup>c</sup>Shandong Key Laboratory of Biochemical Analysis, College of Chemistry and Molecular Engineering, Qingdao University of Science and Technology, Qingdao 266042, China.

E-mail: zhengfenfen@just.edu.cn; xiongweiwei@just.edu.cn.

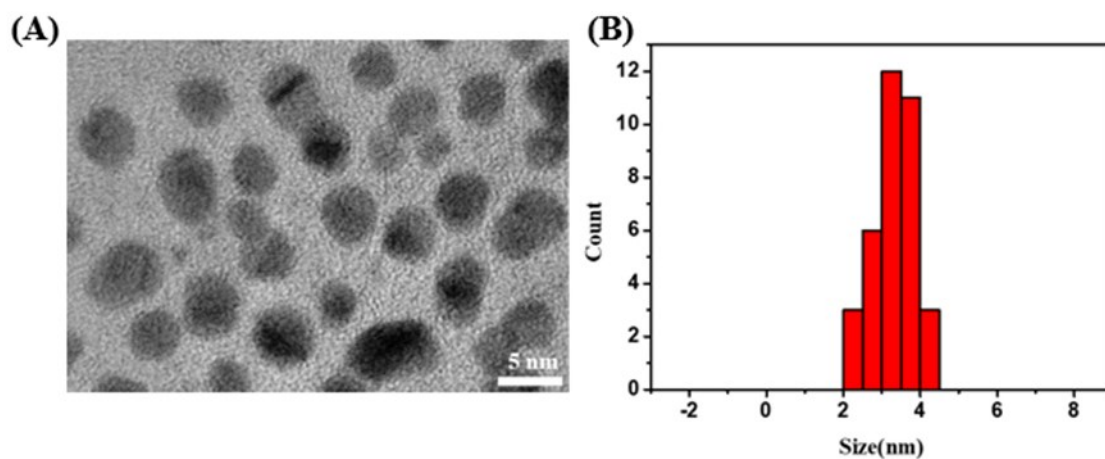

**Fig. S1** (A) TEM image of AuNCs. (B) The corresponding size distribution histogram of AuNCs.

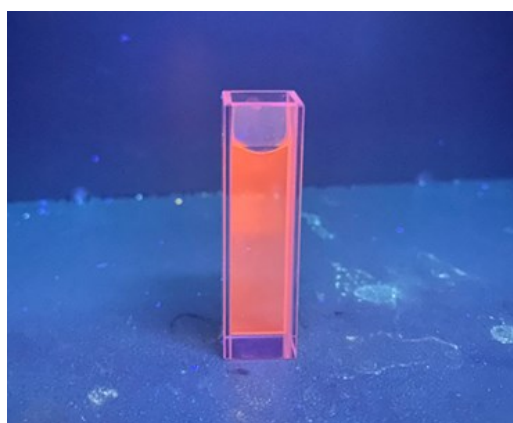

**Fig. S2** Photographs of AuNCs solutions under UV light (302 nm).

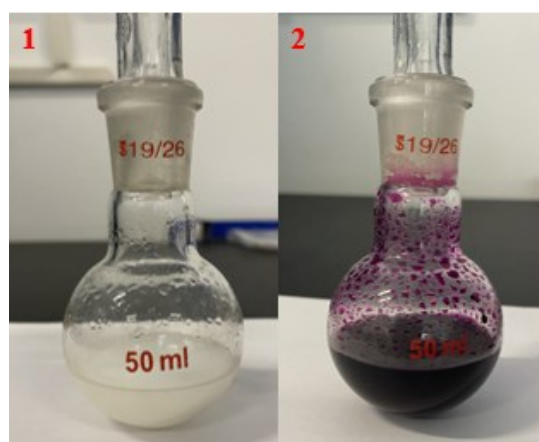

**Fig. S3** Two photos of the 50 mL reaction vessel for preparation of AuNCs doped SiO<sub>2</sub> (1) and AuNCs@MnO<sub>2</sub> (2).

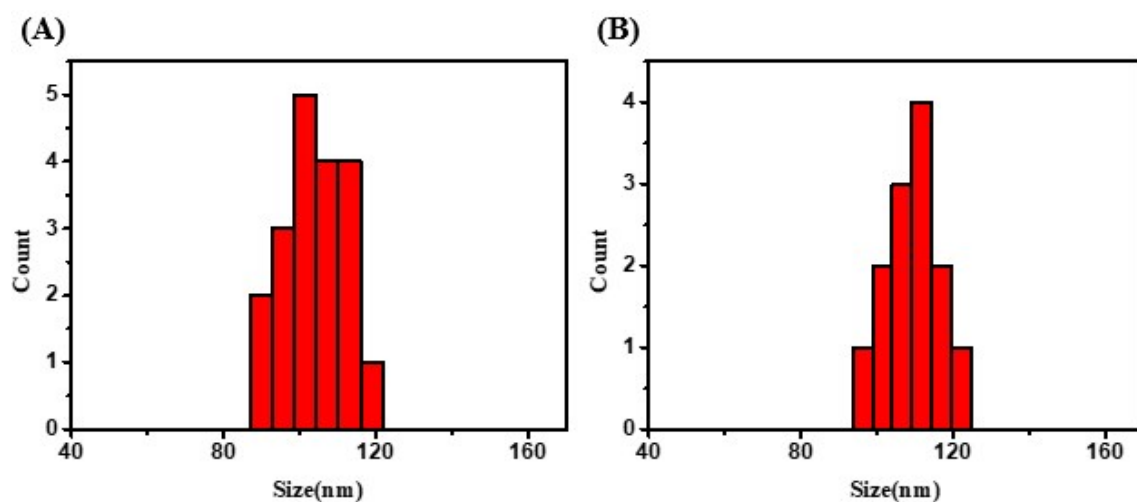

**Fig. S4** The corresponding size distribution histogram of AuNCs doped SiO<sub>2</sub> (A) and AuNCs@MnO<sub>2</sub> (B).

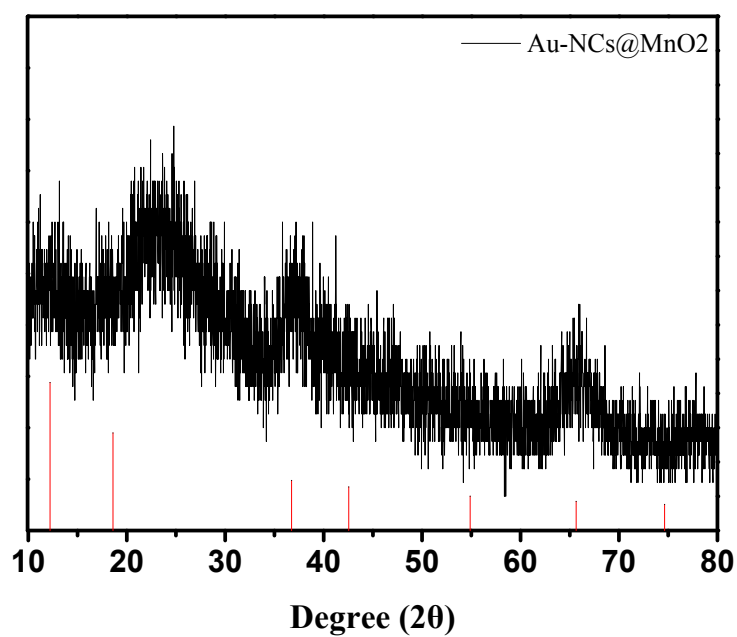

**Fig. S5** XRD spectrum of AuNCs@MnO<sub>2</sub>.

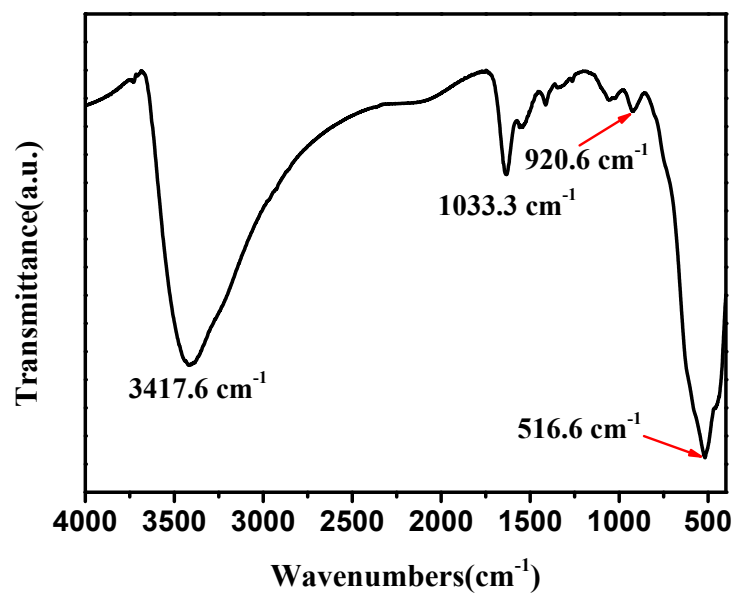

**Fig. S6** The FT-IR spectroscopy AuNCs@MnO<sub>2</sub>.

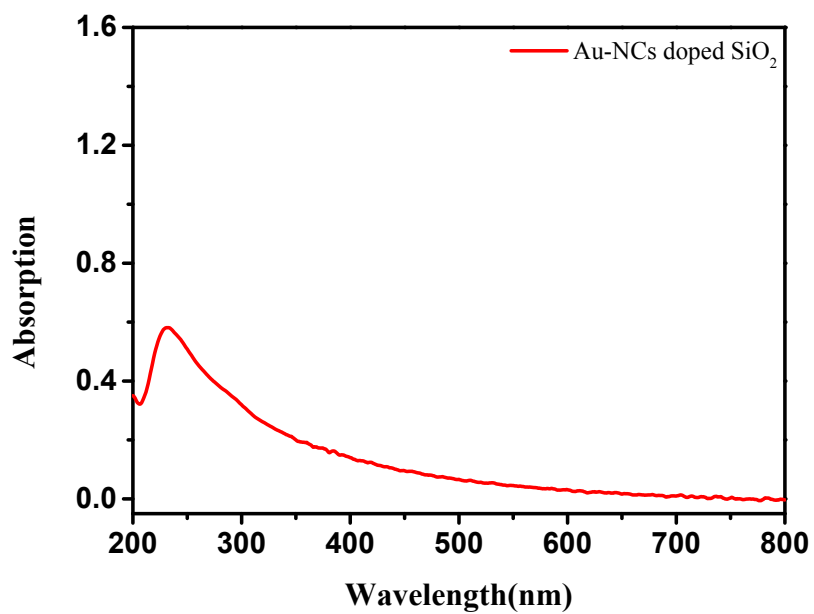

**Fig. S7** UV-vis absorption spectrum of AuNCs doped SiO<sub>2</sub>.

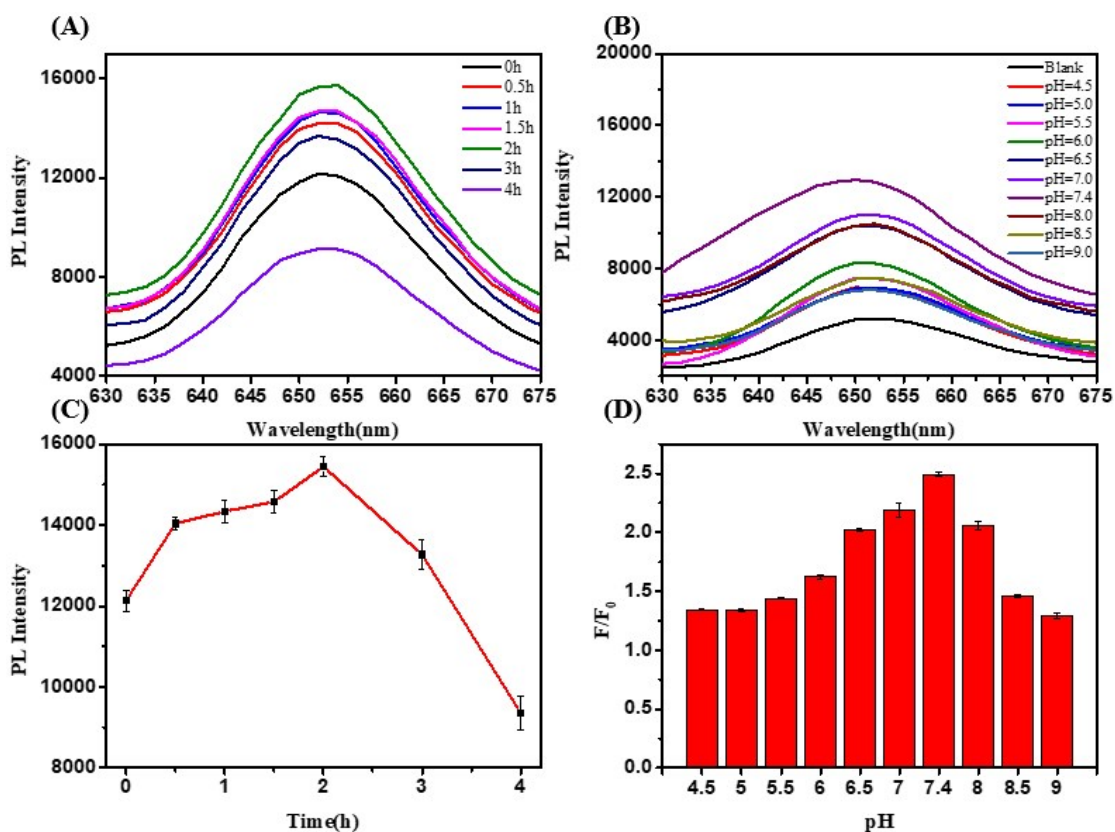

**Fig. S8** (A) Fluorescence spectra of AuNCs@MnO<sub>2</sub> with different incubation times. (B) Fluorescence spectra of AuNCs@MnO<sub>2</sub> with different pH. (C) Point-line plot between the PL intensity at 652 nm and incubation time. (D) A histogram between the  $F/F_0$  at 652 nm and pH ( $F_0$  and  $F$  delegate the PL intensity in the absence and in the presence of GSH, respectively).

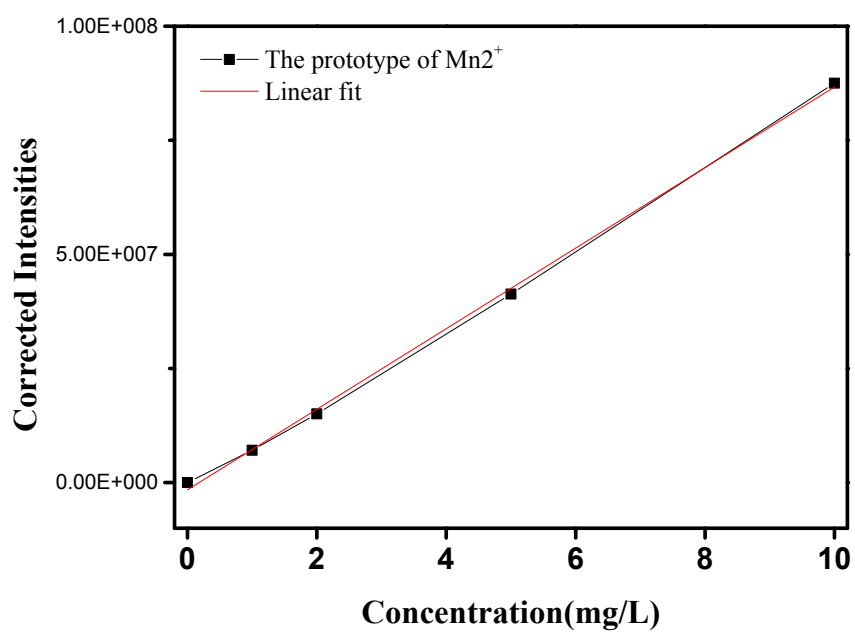

**Fig. S9** The standard curve of Mn<sup>2+</sup> and linear fitting of Mn<sup>2+</sup> prototype.

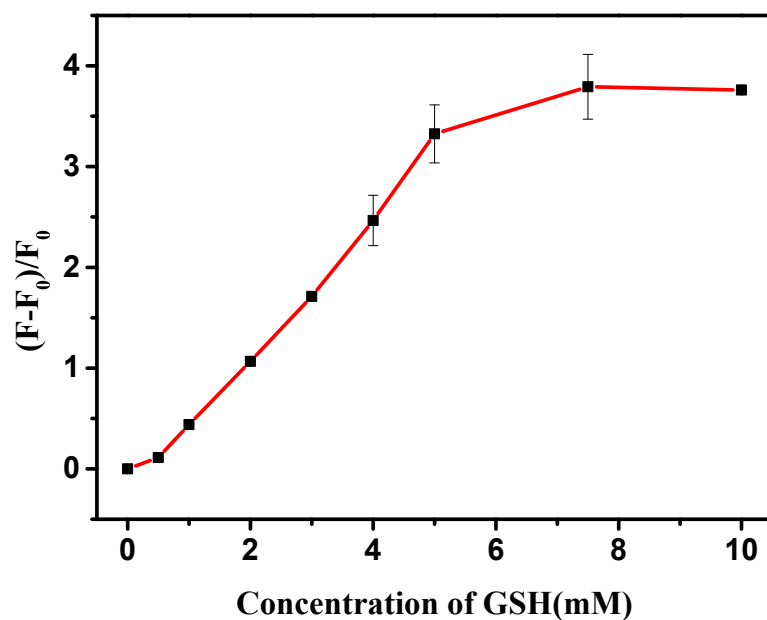

**Fig. S10** Point-line plot of the  $(F-F_0)/F_0$  at 652 nm and GSH concentrations ( $F_0$  and  $F$  delegate the PL intensity in the absence and in the presence of GSH, respectively).

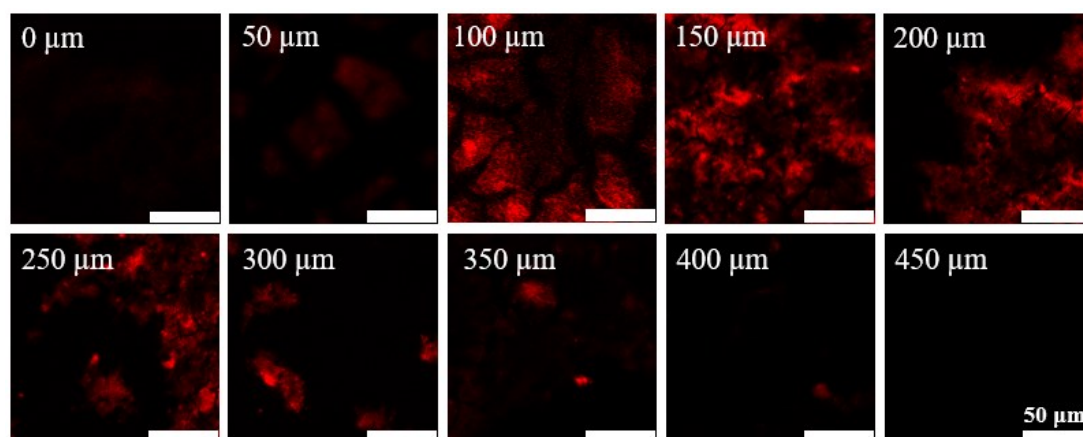

**Fig. S11** Depth fluorescence images of AuNCs@MnO<sub>2</sub> in the tissues were obtained in the z-scan mode (from 0 to 450 μm; step size: 2 μm). The images were obtained at 600-670 nm (red channel). Scale bars: 50 μm.

**Table S1.** Comparison of the proposed method with other methods for GSH detection

| Method                            | Linear range( $\mu\text{mol L}^{-1}$ ) | Detection Limit( $\mu\text{mol L}^{-1}$ ) | React time(min) | Reference |
|-----------------------------------|----------------------------------------|-------------------------------------------|-----------------|-----------|
| HPLC                              | 0.75-10                                | 0.5                                       | /               | 1         |
| Surface Enhanced Raman Scattering | 0.1-0.8                                | 0.05                                      | 5               | 2         |
| Surface Enhanced Raman Scattering | 0.05-0.7                               | 0.04                                      | 45              | 3         |
| Colorimetry                       | 0.05-80                                | 0.05                                      | 10              | 4         |
| Colorimetry                       | 0.1-10                                 | 0.095                                     | 30              | 5         |
| Electrochemiluminescence          | 1.58-200                               | 0.62                                      | /               | 6         |
| Electrochemiluminescence          | 0.3-500                                | 2.2                                       | /               | 7         |
| Fluorometry                       | 2-90                                   | 0.0204                                    | 20              | 8         |

|             |          |       |     |           |
|-------------|----------|-------|-----|-----------|
| Fluorometry | 0.5-100  | 0.15  | 6   | 9         |
| Fluorometry | 10-250   | 36    | 180 | 10        |
| Fluorometry | 0.03-60  | /     | 120 | 11        |
| Fluorometry | 1-50     | 0.943 | 20  | 12        |
| Fluorometry | 13.3-417 | 0.153 | /   | 13        |
| Fluorometry | 0.1-60   | 0.035 | 3   | 14        |
| Fluorometry | 2-5000   | 0.67  | 120 | This work |

## Reference

1. G. P. McDermott, P. S. Francis, K. J. Holt, K. L. Scott, S. D. Martin, N. Stupka, N. W. Barnett and X. A. Conlan, *Analyst*, 2011, **136**, 2578-2585.
2. G. G. Huang, X. X. Han, M. K. Hossain and Y. Ozaki, *Anal Chem.*, 2009, **81**, 5881-5888.
3. L. Ouyang, L. Zhu, J. Jiang and H. Tang, *Anal. Chim. Acta.*, 2014, **816**, 41-49.
4. P. J. Ni, Y. J. Sun, H. C. Dai, J. T. Hu, S. Jiang, Y. L. Wang and Z. Li, *Biosens. Bioelectron.*, 2015, **63**, 47-52.
5. Q. Wang, H. Pang, Y. Dong, Y. Chi and F. Fu, *Microchimica Acta.*, 2018, **185**, 291-298.
6. Y. Ji, Y. Ma and X. Sun, *Anal. Methods.*, 2013, **5**, 1542-1547.
7. P. Lee and R. Compton, *Electroanalysis*, 2013, **25**, 1613-1620.
8. C. Qbwa, C. Cjza and L. Qian, *Dyes and Pigments*, 2020, **176**, 108189.
9. X. Yan, Y. Song and C. Zhu, *ACS Applied Materials & Interfaces.*, 2016, **32**, 05465.
10. L. Hu, X. Wei, J. Meng, X. Wang, X. Chen and J. Wang, *Sens. Actuators B: Chem.*, 2018, **268**, 264-269.
11. M. Wei, P. Yin, Y. Shen, L. Zhang, J. Deng, S. Xue, H. Li, B. Guo, Y. Zhang and S. Yao, *Chem. Commun.*, 2013, **49**, 4640-4642.
12. J. Pan, Z. Zheng, J. Yang, Y. Wu, F. Lu, Y. Chen and W. Gao, *Talanta*, 2017, **166**, 1-7.
13. H. Ma, X. Li, X. Liu, M. Deng, X. Wang, A. Iqbal and W. Qin, *Sens. Actuators B: Chem.*, 2018, **255**, 1687-1693.
14. H. Li, R. Xie and C. Huang, *Sensors and Actuators B Chemical.*, 2020, **321**, 128518.
